# Supplementary material
Source: PubMed Central journal article supplement (PMC2840142)
Supplement: 0908671107_pnas.0908671107_SI.pdf [file 0908671107_pnas.0908671107_SI.pdf]

# Supporting Information

Sandén et al. 10.1073/pnas.0908671107

## SI Text

**The  $pK_a$ s of DOPG and DOPC SUVs.** The  $pK_a$ s of nonlabeled DOPG and DOPC SUVs were estimated by acid-base titrations. Fig. S1A shows a titration curve for DOPG SUVs, indicating a lower  $pK_a$  of  $\sim 3$  and a higher  $pK_a$  of  $\sim 10$ , in agreement with other reports (1, 2); Fig. S1B shows the same curve for DOPC SUVs, with a lower  $pK_a$  of  $\sim 3$  and a higher  $pK_a$  of  $\sim 11$ . The lower  $pK_a$ s probably correspond to the protonation of the phosphatic acid groups for the two samples, and the higher is due to the protonation of glycerol and choline, respectively.

**Effect of Bulk Ion Concentration on  $pK_a$  for Free Oregon Green Fluorophores.** The  $pK_a$ s for Oregon Green fluorophores freely diffusing in an aqueous solution containing 0.90 M NaCl and a pure aqueous solution were determined by a pH titration using a spectrofluorometer (see Fig. S2).

**Number of Lipids Per Liposome and Surface Charge Density of DOPG SUVs.** The number of fluorescently labeled lipids (DHPE-Fluorescein) per liposome was determined by a series of FCS measure-

ments where the concentration of fluorescently labeled lipids in the membrane was varied between  $3.4 \times 10^{-4}$  mol% and  $3.4 \times 10^{-2}$  mol%. From the linear dependence of the count rate per SUV with increasing fluorophore concentration, the number was determined to be 1/25 fluorescently labeled lipids per SUV for the fluorophore-DHPE to lipid ratio of 1:300,000 as used in this study. Knowing the concentration of fluorescently labeled SUVs, the number of lipids per SUV is estimated to be  $11,800 \pm 500$ .

For DOPG SUVs at neutral pH each lipid can be assumed to be negatively charged, due to the low  $pK_a$  of the DOPG lipids. Thus, the surface charge density of the membrane equals the surface area of the liposome divided by the number of lipids on each surface. This gives a surface charge density of  $1/50 \text{ \AA}^2$  for DOPG SUVs.

The average number of protons on the SUV surface for a specific bulk pH can be calculated from the number of lipids per SUV,  $n_{\text{SUV}}$ , and the  $pK_a$  of the lipids as  $\frac{n_{\text{SUV}}}{10^{\text{pH}-pK_a^{\text{lipid}}}}$ .

1. Van Dijk PWM, de Kruijff B, Verkleij AJ, van Deenen LLM, and de Gier J (1978) Comparative studies on effects of pH and  $\text{Ca}^{2+}$  on bilayers of various negatively charged phospholipids and their mixtures with phosphatidylcholine. *Biochimica Et Biophysica Acta* 512(1):84–96.

2. Egorova EM (1998) Dissociation constants of lipid ionizable groups I. Corrected values for two anionic lipids. *Colloid Surface A* 131(1–3):7–18.

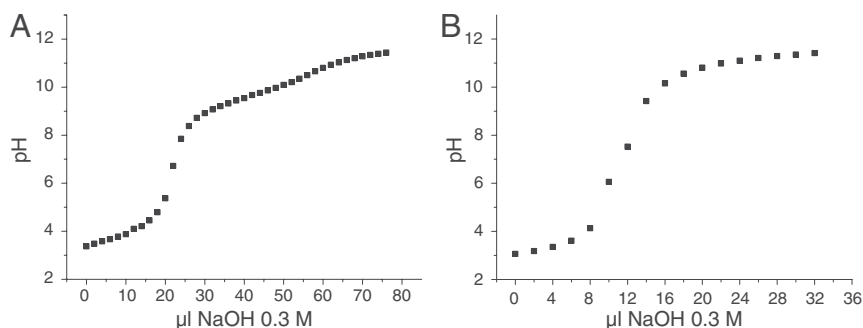

Fig. S1. Titration curves demonstrating the bulk pH response after addition of 0.3 M NaOH in aliquots of 2  $\mu\text{l}$  to a 1.7 ml solution containing DOPG SUVs (A) and DOPC SUVs (B) in 0.15 M NaCl.

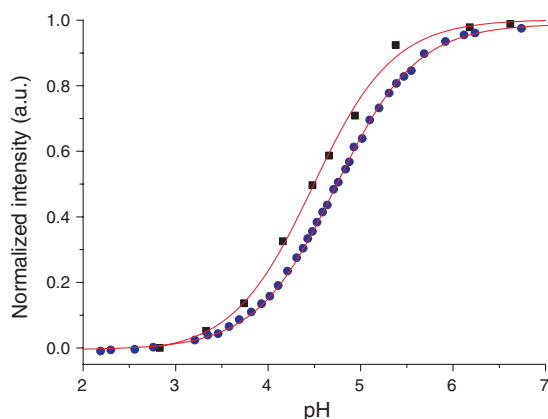

Fig. S2. Normalized fluorescence intensities vs. pH for free Oregon Green in aqueous solution with 0.90 M NaCl (black squares) and a pure aqueous solution (blue circles). Fits to data (red lines) using the Henderson-Hasselbalch equation yields  $pK_a$ s 4.5 and 4.7 for the 0.90 M NaCl and the pure aqueous solutions, respectively.
